# Supplementary material
Source: ML conference proceedings conference paper supplement (https://openreview.net/forum?id=psyvs5wdAV)
Supplement: supplementary_material [file attachment]

# Appendix for “Equivariant Motion Manifold Primitives”

Anonymous Author(s)

Affiliation

Address

email

## A Proofs of Propositions

**Proof of Group-Equivariance of (3.1).** The equivariance of the ground truth EMMP and the invariance of  $g$  proves the proposition as follows:

$$\mathcal{Z}_{h \cdot \tau} = g(\mathcal{M}_{h \cdot \tau}, h \cdot \tau) = g\left(\bigcup_{x \in \mathcal{M}_\tau} h \cdot (x, \tau)\right) = g\left(\bigcup_{x \in \mathcal{M}_\tau} (x, \tau)\right) = g(\mathcal{M}_\tau, \tau) = \mathcal{Z}_\tau. \quad (1)$$

□

**Proof of Group-Equivariance of (3.2).** The equivariance of  $f$  and invariance of  $g$  proves the proposition as follows:

$$\widehat{\mathcal{M}}_{h \cdot \tau} = f(\mathcal{Z}_{h \cdot \tau}, h \cdot \tau) = \bigcup_{z \in \mathcal{Z}_\tau} [h \cdot (f(z, \tau), \tau)]_x = \bigcup_{x \in \widehat{\mathcal{M}}_\tau} [h \cdot (x, \tau)]_x = \{[h \cdot (x, \tau)]_x \mid x \in \widehat{\mathcal{M}}_\tau\}. \quad (2)$$

□

**Proof of Group-Equivariance of (3.3).** Invariance of  $g_\phi$  can be seen by the equivariance of  $\bar{h}$ , as follows:

$$g_\phi(h \cdot (x, \tau)) = G_\phi(\bar{h}(h \cdot \tau)^{-1} \cdot (h \cdot (x, \tau))) = G_\phi((h\bar{h}(\tau))^{-1}h \cdot (x, \tau)) = G_\phi(\bar{h}(\tau))^{-1} \cdot (x, \tau) = g_\phi(x, \tau) \quad (3)$$

Equivariance of  $f_\theta$  can be seen as follows:

$$\begin{aligned} f_\theta(z, h \cdot \tau) &= [\bar{h}(h \cdot \tau) \cdot (F_\theta(z, \bar{h}(h \cdot \tau)^{-1} \cdot (h \cdot \tau)), \bar{h}(h \cdot \tau)^{-1} \cdot (h \cdot \tau))]_x \\ &= [h \cdot \bar{h}(\tau) \cdot (F_\theta(z, \bar{h}(\tau)^{-1}(\tau)), \bar{h}(\tau)^{-1} \cdot \tau)]_x \\ &= [h \cdot (f_\theta(z, \tau), \tau)]_x \end{aligned} \quad (4)$$

□

## B Related Works

In this section, we provide an overview of areas related to our work.

### B.1 Movement Primitives

In this section, we consider any form of mathematical representation that describes motions (e.g., trajectories) as movement primitives.

Motion primitives as generative models that output motion trajectories in any form, given a parameter that specifies the task, which we refer to as a task parameter. The goal of motion primitives is to generate motion trajectories similar to demonstration trajectories given by humans. One standard way @@ The generated trajectories of movement primitives can be parameterized and represented in various forms. One standard way is to represent the trajectories using a stable dynamical system. A dynamical system can be seen as a movement primitive since it can output a solution trajectory given an initial state. Dynamic movement primitives represent trajectories in the form of time-dependent nonlinear dynamical systems which consist of mass-spring-damper systems with

25 additional force term [1, 2, 3, 4, 5, 6, 7, 8, 9, 10]. Stable dynamical system-based approaches encode  
 26 demonstration trajectories into state-dependent dynamical systems that are globally asymptotically  
 27 stable [11, 12, 13, 14, 15, 16, 17, 18, 19].

28 However, the task parameters of most movement primitives are strictly restricted to the initial and  
 29 final configurations. This limits the range of tasks that can be parameterized. In the case of water  
 30 pouring, the cup’s position and the amount of water can not be represented by the initial and final  
 31 configurations. By adopting conditional variational autoencoder’s structure, MMPs and EMMPs  
 32 provide freedom of defining task parameters.

## 33 **B.2 Autoencoder-Based Manifold Learning**

34 Autoencoders have gained prominence in recent years for identifying and generating samples from  
 35 a given data distribution’s underlying low-dimensional manifold structure. The main reason autoen-  
 36 coders are frequently adopted for manifold learning is that they learn the latent space coordinates  
 37 along with the manifolds. To learn more accurate manifolds, researchers have introduced addi-  
 38 tional regularization terms [20, 21, 22, 23, 24]. For a specific structure of conditional variational  
 39 autoencoder, where the decoder gets an additional conditional parameter, the need to disentangle the  
 40 conditional inputs and latent values has risen. [25] introduced a regularization term to disentangle  
 41 input spaces of its decoder, by solving adding an auxiliary neural network to estimate conditional  
 42 inputs from latent values, and regularizing the autoencoder by making it harder for the auxiliary  
 43 network to estimate. However, unlike the independence regularization term that we introduced, the  
 44 regularization term does not necessarily guarantee independence between the two spaces.

### 45 **B.2.1 Autoencoder-Based Motion Manifold primitive**

46 In this section, we introduce an existing motion manifold primitive framework called TC-VAE [26].  
 47 TC-VAE aims to parameterize the motion manifold given a task parameter based on autoencoder  
 48 frameworks. As TC-VAE adopts the structure of [25], the decoder of it takes additional task param-  
 49 eter inputs other than the latent value inputs. TC-VAE also adopts the regularization term of [25]  
 50 for disentangling the task parameters and the latent values, which still shares the shortcoming of not  
 51 guaranteeing independence between latent space and the conditional input space.

## 52 **B.3 Equivariant Models in Robotics**

53 Invariance and equivariance properties have played a role in deep learning models as an inductive  
 54 bias to generalize well and be trained data efficiently [27]. Translation equivariance in convolu-  
 55 tional neural networks (CNNs) has been effective for image recognition tasks [28]. Group equiv-  
 56 ariant CNNs have expanded the equivariance in CNNs to more complex equivariance, e.g. SO(3)-  
 57 equivariance achieved by spherical CNNs [29, 30]. In robot manipulation tasks, [31] proposed an  
 58 SE(3)-equivariant object representation, and [32] introduced a SE(2)-equivariant dynamics model  
 59 learning for pushing manipulation. Most of the existing equivariant models in robotics are restricted  
 60 to certain types of groups, whereas our work can be applied to tasks with arbitrary group symmetries.

## 61 **C Experimental and Implementation Details**

62 Throughout the experiments, we have used RTX 2080 Ti, RTX 3080 Ti, RTX 3090 for training the  
 63 models, and each experiment takes a few hours to 10 hours depending on the model.

### 64 **C.1 Evaluation Metrics**

65 **Reconstruction Error:** We measure reconstruction error in the test dataset using following equation:

$$\text{Reconstruction loss} = \sqrt{\frac{1}{N} \sum_{i=1}^N \frac{1}{M_i} \sum_{j=1}^{M_i} \frac{1}{T} d_{\mathcal{X}}^2(f_{\theta}(g_{\phi}(x_{ij}, \tau_i), \tau_i), x_{ij})}. \quad (5)$$

**Latent-Task Dataset:** To calculate mutual information and negative log-likelihood, we define a dataset of  $(z, \tau)$  paired dataset. To build the dataset large enough, we first randomly augment  $(x, \tau)$  pairs in the training dataset 100 times. Then, the every  $z$  is the encoded values from  $(x, \tau)$ ;  $z = g_\phi(x, \tau)$ .

**Mutual Information:** Mutual information between  $z$  and  $\tau$  is measured using Mutual Information Neural Estimator (MINE) [33]. MINE estimates by, which estimates mutual information by maximizing its lower bound, using the Donsker-Varadhan representation:

$$D_{KL}(\mathcal{Z}||\mathcal{T}) \geq \sup_{F \in \mathcal{F}} \mathbb{E}_{\mathcal{Z}}[F] - \log(\mathbb{E}_{\mathcal{T}} e^F), \quad (6)$$

where  $\mathcal{F}$  is any class of functions  $F : \Omega \rightarrow \mathbb{R}$ . In our case,  $\Omega = \mathcal{Z} \times \mathcal{T}$ . By replacing  $\mathcal{F}$  by parametric family  $\mathcal{F}_\Theta$ , the mutual information is estimated as follows:

$$I_\Theta(\mathcal{Z}, \mathcal{T}) = \sup_{\theta \in \Theta} \mathbb{E}_{p(z, \tau)} F_\theta - \log(\mathbb{E}_{p(z)p(\tau)} e^{F_\theta}). \quad (7)$$

We train MINE using the latent-task dataset for 1,500 iterations with a batch size of 5,000 equally for all models.

**Negative Log-Likelihood:** Given  $(z, \tau)$  from the latent-task dataset, we calculate negative log-likelihood  $-\log(p_{\mathcal{M}_\tau}(g_\phi(z)))$  in trajectory space  $\mathcal{X}$ , using the following equation:

$$p_{\mathcal{M}_\tau}(g_\phi(z, \tau)) = p_{\mathcal{Z}_\tau}(z) |\det [J_{g_\phi}^T J_{g_\phi}]|^{-\frac{1}{2}}, \quad (8)$$

where  $J_{g_\phi}$  denotes  $\frac{\partial g_\phi}{\partial z}(z, \tau)$ .

## C.2 Planar Mobile Robot Experiment

### C.2.1 Formulas and Proofs

**Task Parameter Space:** Recall that the configuration space is  $\mathcal{Q} = \mathbb{R}^2$ , the trajectory space is  $\mathcal{X} = \mathbb{R}^{2T}$ . The task parameter  $\tau$  consists of the initial position of the mobile robot, denoted by  $(q_r^1, q_r^2)$ , and the rotated angle of the wall axis  $\hat{x}_w$  with respect to  $\hat{x}_s$ , denoted by  $\omega_w$ .

To uniformly sample from  $\mathcal{T}$  we make  $\mathcal{T}$  compact by restricting the initial position of the motile robot to be on a disk whose center is the origin, the inner radius is 5, and the outer radius is 10. Also, we have limited the wall rotation axis to  $-\frac{\pi}{4} \leq \omega_w < \frac{\pi}{4}$  to make the problem easier for non-equivariant methods e.g. TC-VAE. since the wall's geometries are identical every 90 degrees, the wall still can span all possible geometrical configurations.

**Trajectory Space and Distance Measure:** We set the length of trajectories  $T = 201$ , which makes the trajectory space  $\mathcal{X} = \mathbb{R}^{402}$ . The distance measure is defined as:  $d_{\mathcal{X}}(x_1, x_2) := \|x_1, x_2\|_2$ .

**Group Operations:** Recall that the symmetry group  $H$  is  $H := p4m \times \text{SO}(2)$ , where  $p4m$  is a specific type of wallpaper group and  $\text{SO}(2)$  is the group of  $2 \times 2$  rotation matrices. We denote  $p4m := \{(i, j) | i \in \{0, 1\}, j \in \{0, 1, 2, 3\}\}$ , where  $i \in \{0, 1\}$  represents flipping and  $j \in \{0, 1, 2, 3\}$  represents  $n\pi/2$  rotation. Throughout this section, we represent an  $\text{SO}(2)$  element  $R = \begin{bmatrix} \cos \alpha & -\sin \alpha \\ \sin \alpha & \cos \alpha \end{bmatrix} \in \text{SO}(2)$  simply as  $\alpha$ .

Given two group elements  $((a, b), \alpha), ((c, d), \beta) \in p4m \times \text{SO}(2)$ , the group operation is defined as:

$$((a, b), \alpha)((c, d), \beta) = ((\text{mod}(a + c, 2), \text{mod}(b + (-1)^a d, 4)), \alpha + \beta), \quad (9)$$

where  $\text{mod}(x, y)$  denotes the remainder of  $\frac{x}{y}$ .

**Group Actions:** The procedure of the group actions of  $H = p4m \times \text{SO}(2)$  can be explained as follows: (i) flip the robot over the wall axis (ii) rotate the robot around the origin  $\frac{n\pi}{2}$ , and finally, (iii) rotated the robot and the wall. Given a task parameter  $\tau = (q_r^1, q_r^2, \omega_w)$  and a group element  $h = ((a, b), \alpha)$ , the group action  $h \cdot \tau$  is then defined as:

$$h \cdot \tau = (\text{Rot}(\alpha + \omega_w + \frac{b\pi}{2}) * \text{flip}(a) * \text{Rot}(-\omega_w) * (q_r^1, q_r^2), \alpha + \omega_w) \quad (10)$$

103 where  $*$  denotes matrix multiplication,  $\text{flip}(a) := \begin{bmatrix} 1 & 0 \\ 0 & -1 \end{bmatrix}^a$ , and  $\text{Rot}(\alpha) := \begin{bmatrix} \cos \alpha & -\sin \alpha \\ \sin \alpha & \cos \alpha \end{bmatrix}$ .

104 Given a trajectory  $x = \{(q_i^1, q_i^2)\}_{i=1}^T$ , a task parameter  $\tau = (q_r^1, q_r^2, \omega_w)$  and a group element  
105  $h = ((a, b), \alpha)$ , the group action  $h \cdot (x, \tau)$  is defined as :

$$h \cdot (x, \tau) = (\{\text{Rot}(\alpha + \omega_w + \frac{b\pi}{2}) * (q_i^1, q_i^2)\}_{i=1}^T, h \cdot \tau). \quad (11)$$

106 **Group-Equivariant Module  $\bar{h}$ :** Given a task parameter  $\tau$ ,  $\bar{h}(\tau)$  can be divided into two elements,  
107  $\bar{h}(\tau) = (\bar{h}_1(\tau), \bar{h}_2(\tau))$ , where  $\bar{h}_1(\tau) = (\bar{h}_1^1(\tau), \bar{h}_1^2(\tau)) \in p4m$  and  $\bar{h}_2(\tau) \in \text{SO}(2)$ . Figure 1  
108 illustrates  $\bar{h}(\tau)$ , and its equivariance for  $\bar{h}_1$  using two group actions  $h_{\text{flip}} = (1, 0, 0)$  and  $h_{\text{rot90}} =$   
109  $(0, 1, 0)$ . It can be seen by the commutative diagram that  $\bar{h}(h_{\text{flip}} \cdot \tau) = h_{\text{flip}} \bar{h}(\tau)$  and  $\bar{h}(h_{\text{rot90}} \cdot$   
110  $\tau) = h_{\text{rot90}} \bar{h}(\tau)$ . The rest cases of flipping and rotating 90, 180, 270 degrees can be shown in the  
111 same way. As shown,  $\bar{h}_2(\tau)$  is defined as  $\bar{h}_2(\tau) = \omega_w$ . The equivariance of  $\bar{h}_2$  can be shown by  
112  $h_{\text{rot}} = (0, 0, \alpha)$  and  $\tau = (q_r^1, q_r^2, \omega_w)$ :

$$\bar{h}(h_{\text{rot}} \cdot \tau) = (q_r^1, q_r^2, \omega_w + \alpha) = (0, 0, \alpha)(q_r^1, q_r^2, \omega_w) = h_c \bar{h}(\tau). \quad (12)$$

113 Equivariance for the case where  $h = (a, b, \alpha)$  is then simply shown by dividing it into  $h =$   
114  $(0, 0, \alpha)(a, b, 0)$ :

$$\begin{aligned} \bar{h}((a, b, \alpha) \cdot \tau) &= \bar{h}(((0, 0, \alpha)(a, b, 0)) \cdot \tau) \\ &= \bar{h}((0, 0, \alpha) \cdot (a, b, 0) \cdot \tau) \\ &= (0, 0, \alpha) \bar{h}((a, b, 0) \cdot \tau) \\ &= (a, b, 0)(0, 0, \alpha) \bar{h}(\tau) \\ &= (a, b, \alpha) \bar{h}(\tau). \end{aligned} \quad (13)$$

115 Below equation is the formal definition of  $\bar{h}$  given a  $\tau = (q_r^1, q_r^2, \omega_w)$ :

$$\begin{aligned} \bar{h}_1^1(\tau) &= \begin{cases} 0, & \text{if } \frac{k\pi}{2} \leq \text{atan2}(q_r^2, q_r^2) - \omega_w < \frac{k\pi}{2} + \frac{\pi}{4}, \\ 1, & \text{otherwise} \end{cases}, \\ \bar{h}_1^2(\tau) &= \begin{cases} 0, & \text{if } -\frac{\pi}{4} \leq \text{atan2}(q_r^2, q_r^2) - \omega_w < \frac{\pi}{4} \\ 1, & \text{if } \frac{\pi}{4} \leq \text{atan2}(q_r^2, q_r^2) - \omega_w < \frac{3\pi}{4} \\ 2, & \text{if } \frac{3\pi}{4} \leq \text{atan2}(q_r^2, q_r^2) - \omega_w < \pi \\ & \text{or } -\pi \leq \text{atan2}(q_r^2, q_r^2) - \omega_w < -\frac{3\pi}{4} \\ 3, & \text{if } -\frac{3\pi}{4} \leq \text{atan2}(q_r^2, q_r^2) - \omega_w < -\frac{\pi}{4} \end{cases}, \\ \bar{h}_2(\tau) &= \omega_w, \end{aligned} \quad (14)$$

116 where  $k \in \{-2, -1, 0, 1\}$  and  $(\text{atan2}(q_r^2, q_r^2) - \omega_w)$  is assumed to be satisfying  $-\pi \leq$   
117  $\text{atan2}(q_r^2, q_r^2) - \omega_w < \pi$ .

## 118 C.2.2 Experimental Details

119 **Datasets:** For dataset generation, we first uniformly sample from the smallest space that can span  
120  $\mathcal{T}$  by symmetry transformations, in which the robot's initial position  $q_r$  satisfies  $5 \leq \|q_r\| < 10$   
121 and  $0 \leq \text{atan2}(q_r^2, q_r^1) < \pi/4$ , and the wall axis angle is 0. We collect trajectory data by generating  
122 B-splines given via points labeled by humans. The B-splines are then reparameterized so that the  
123 time length of the splines becomes 5 seconds, where the splines accelerate for the first second and  
124 decelerate for the last second. We finally sample 201 points from the splines.

125 For the training dataset, we have gathered 6 trajectories for 75 randomly given task parameters, a  
126 total of 300 trajectories for training. For the validation dataset, we have gathered a trajectory for 80  
127 randomly given task parameters and randomly augmented them using symmetry transformations 100  
128 times. For the test dataset, we have gathered a trajectory for 40 randomly given task parameters and  
129 randomly augmented them using symmetry transformations 1000 times. The number of validation  
130 and test datasets are then 8,000 and 40,000 respectively.

131 **Network Architectures and Training Details:** A task parameter  $\tau$  is represented as  $(q_r^1, q_r^2, \omega_w)$ ,  
132 where  $(q_r^1, q_r^2)$  is the mobile robot's initial position and  $\omega_w$  is the wall's axis angle. In practical

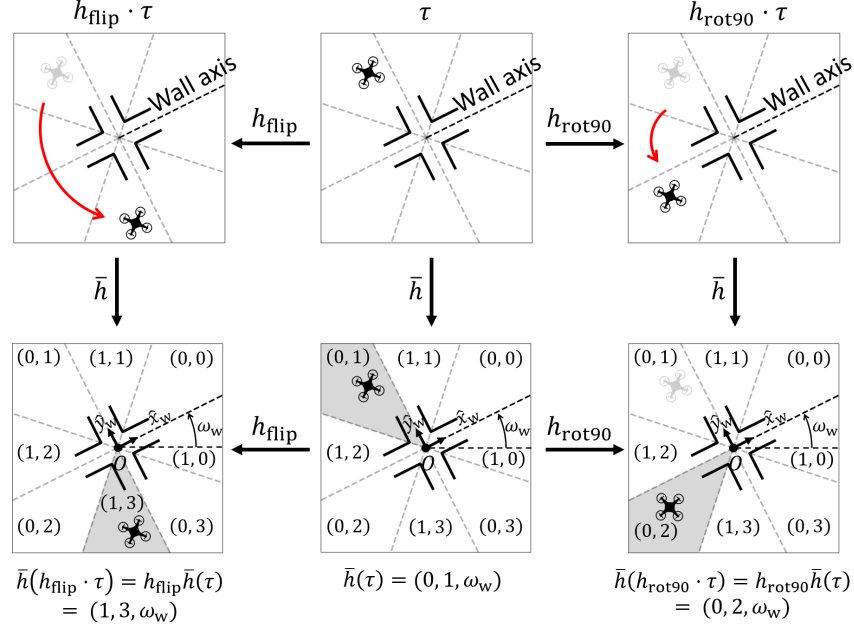

Figure 1: Illustration of  $\bar{h}$  and its equivariance.  $h_{\text{flip}} := (1, 0, 0)$  is the flipping motion of the mobile robot over the wall axis, and  $h_{\text{rot90}} := (0, 1, 0)$  is the rotation of the mobile robot 90 degrees around the origin. It can be seen that  $h_{\text{flip}} \bar{h}(\tau) = (1, 0, 0)(0, 1, \omega_w) = (1, \text{mod}(0 - 1, 4), \omega_w) = (1, 3, \omega_w) = \bar{h}(h_{\text{flip}} \cdot \tau)$  and  $h_{\text{rot90}} \bar{h}(\tau) = (0, 1, 0)(0, 1, \omega_w) = (0, \text{mod}(1 + 1, 4), \omega_w) = (0, 2, \omega_w) = \bar{h}(h_{\text{rot90}} \cdot \tau)$ .

133 implementation, we use  $(q_r^1, q_r^2, \cos \omega_w, \sin \omega_w) \in \mathbb{R}^4$  as an input parameter vector. Since  $T = 201$ ,  
134 the output space is  $\mathbb{R}^{402}$ .

135 We use two-layer fully connected neural networks of 512 nodes for MMPs and EMMPs with elu  
136 as their activation function. TC-VAE’s encoder includes a fully connected network and a temporal  
137 convolutional network, and the decoder includes two fully connected networks for  $z$  and  $\tau$ , a tem-  
138 poral convolutional network, and a fully connected network. All four fully connected networks used  
139 in TC-VAE are of two layers with size 434. The output sizes of fully connected networks for  $z$  and  
140  $\tau$  in the decoder are 36 and 72 respectively. The two temporal convolutional layers in TC-VAE are  
141 both with channel sizes (18, 36, 72) and kernel size 3. More details on the structure of TC-VAE are  
142 in [26]. All models in the experiments have similar number of parameters ( $\approx 9.4 \times 10^5$ ).

143 **Success Criterion:** We consider a trajectory successful if it is consistent with the task parameter and  
144 reaches the goal without colliding with the wall. More specifically, we check (i) collision avoidance,  
145 (ii) the robot’s initial position, and the robot’s final position. We consider the trajectory satisfies (ii)  
146 and (iii) if the initial configuration and the final configuration are within a radius of 0.3 at the initial  
147 position specified in the task parameter and origin, respectively. The number of sample  $(z, \tau)$  we  
148 use for success rate calculation is 50,000.

### 149 C.2.3 Additional results

150 **Architecture Comparison:** We compare MMPs and EMMPs of fully connected autoencoders (de-  
151 noted as AE), fully connected variational autoencoders (denoted as VAE), and variational autoen-  
152 coders of the same structure with TC-VAE (denoted as TC-VAE). Table 1 shows the four evaluation  
153 metrics. Overall, as shown in the success rate scores, regardless of network architecture and autoen-  
154 coder method, EMMPs without regularization perform the best, and MMPs without regularization  
155 perform the worst. Although EMMP (TC-VAE) excels in most measures (MI and NLL) its success  
156 rate (91.2%) is still lower than EMMP (AE)’s (92.40%) and EMMP (VAE)’s (95.72%), which is  
157 caused by the tendency of (TC-VAE) that it violates the initial and final condition in about 6% of  
158 trials, whereas EMMP (AE) only violates them and EMMP (VAE) almost never violate them (0%  
159  $\sim 0.01\%$ ).

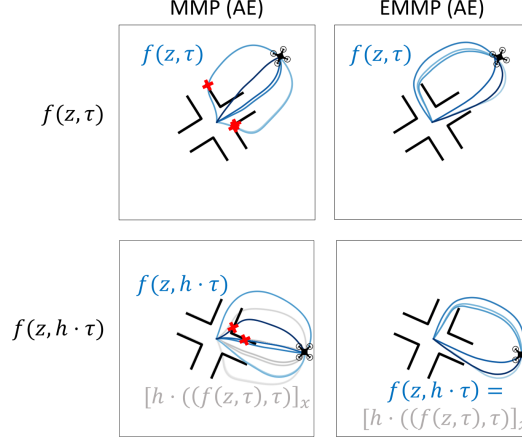

Figure 2: Equivariance comparison between MMP (AE) and EMMP (AE). If the decoder  $f$  is equivariant,  $f(z, h \cdot \tau)$  (blue lines in the figure) and  $[h \cdot (f(z, \tau), \tau)]_x$  (grey lines in the figure) must overlap. It can be seen that the decoder of MMP is not equivariant, whereas the EMMP’ decoder is equivariant.

**Equivariance Comparison:** Here, we qualitatively compare the equivariance performance of random data augmentation and equivariant learning method by comparing MMP (AE) and EMMP (AE). Figure 5 shows trajectories generated by  $\tau$  and  $h \cdot \tau$ , with same  $z$ . If the decoder  $f$  is equivariant,  $f(z, h \cdot \tau)$  (blue lines in the figure) and  $[h \cdot (f(z, \tau), \tau)]_x$  (grey lines in the figure) must overlap. However, as shown in the Figure 5 Left, trajectories of the MMP do not, whereas trajectories of the EMMP perfectly overlap as shown in Figure 5 Right.

### C.3 Water-Pouring Experiment

#### C.3.1 Formulas and Proofs

**Task Parameter Space:** The input space  $Q = \mathbb{R}^2 \times \text{SE}(3) \times [0.2, 0.41]$ . A task parameter  $\tau$  can be represented as  $((q_c^1, q_c^2), (q_b^1, q_b^2, q_b^3, R_b)), m_w$ , where  $(q_c^1, q_c^2)$  is the cup’s position,  $(q_b^1, q_b^2, q_b^3, R_b)$  is the bottle’s initial position and orientation, and  $m_w$  is the weight of water in the bottle. To construct compact  $\mathcal{T}$ , we limit  $(q_c^1, q_c^2)$  to be inside a square at the origin with edge length of 0.5, i.e.,  $-0.25 \leq q_c^1, q_c^2 \leq 0.25$ , and limit the distance between  $(q_c^1, q_c^2)$  and  $(q_b^1, q_b^2)$  to satisfy  $0.3 \leq \|q_b^1 - q_c^1, q_b^2 - q_c^2\|_2 \leq 0.78$ . Since the bottle is on the table upright,  $q_b^3$  is a constant.

**Trajectory Space and Distance Measure:** We set the length of trajectories  $T$  to be 480, which makes trajectory space  $\mathcal{X} = \text{SE}(3)^{480}$ . Given  $x_1 = \{x_1^i\}_{i=1}^{480}$  and  $x_2 = \{x_2^i\}_{i=1}^{480}$ , where each  $x_j^i$  can be represented by  $(R_{ij} \in \text{SO}(3), p_{ij} \in \mathbb{R}^3)$ , the distance measure on  $\mathcal{X}$  is defined as:

$$d_{\mathcal{X}}(x_1, x_2) := \sqrt{\sum_i (||R_{i1}^{-1} * R_{i2} - I||_F^2 + \gamma ||p_{i1} - p_{i2}||_2^2)}, \quad (15)$$

where  $\gamma = 5$  is a constant.

Table 1: Reconstruction Error (RE), Mutual Information (MI), and Negative Log-Likelihood (NLL); the lower, the better. Success Rate (SR); the higher, the better.

| Method                | RE ( $\downarrow$ ) | MI ( $\downarrow$ ) | NLL ( $\downarrow$ ) | SR ( $\uparrow$ ) |
|-----------------------|---------------------|---------------------|----------------------|-------------------|
| MMP (AE)              | 0.223               | 0.487               | $1.49 \times 10^4$   | 50.08%            |
| MMP (VAE)             | 0.233               | 0.687               | $1.57 \times 10^4$   | 42.98%            |
| MMP (AE) + indep      | 0.225               | 0.329               | $1.48 \times 10^4$   | 52.39%            |
| MMP (VAE) + indep     | 0.229               | 0.652               | $1.56 \times 10^4$   | 44.28%            |
| EMMP (AE)             | 0.223               | 0.082               | $1.25 \times 10^4$   | 92.40%            |
| EMMP (AE) + indep     | 0.229               | 0.077               | $1.24 \times 10^4$   | 86.66%            |
| EMMP (VAE)            | 0.231               | 0.066               | $1.23 \times 10^4$   | 95.72%            |
| EMMP (VAE) + indep    | 0.225               | 0.167               | $1.28 \times 10^4$   | 82.02%            |
| EMMP (TC-VAE)         | 0.227               | 0.065               | $1.00 \times 10^4$   | 91.20%            |
| EMMP (TC-VAE) + indep | 0.247               | 0.071               | $1.15 \times 10^4$   | 88.22%            |

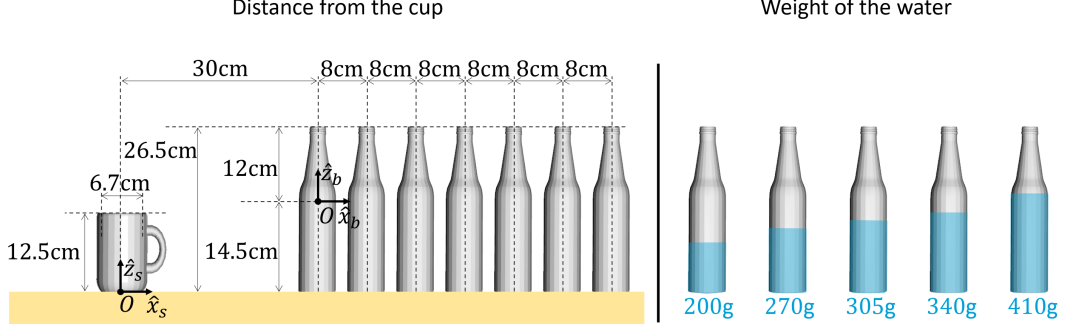

Figure 3: Task parameters for demonstration. The cup is always at the origin, and the bottle is at  $(0, r \in 0.3, 0.38, 0.54, 0.62, 0.78, 0.145)$ . The mass of water in the bottle is  $m_w \in 0.2, 0.27, 0.305, 0.34, 0.41$ .

**Group Operations:** The symmetry group  $H = \mathbb{R}^2 \times \text{SO}(2) \times \text{SO}(2)$ , each is for translation of the cup and the bottle, rotation of the bottle around the cup, and rotation of the bottle around itself. Given two group elements  $(a, b, R_{c1}, R_{b1}), (c, d, R_{c2}, R_{b2}) \in \mathbb{R}^2 \times \text{SO}(2) \times \text{SO}(2)$ , the group operation is defined as follows:

$$(a, b, R_\alpha, R_\beta)(c, d, R_\gamma, R_\delta) = (a + c, b + d, R_\alpha * R_\gamma, R_\beta * R_\delta). \quad (16)$$

**Group Actions:** The procedure of group actions of  $h \in H$  can be explained as follows: (i) translate the cup and the bottle, (ii) rotate the bottle around the cup, and (iii) rotate the bottle around itself. Given a task parameter  $\tau = ((q_c^1, q_c^2), (q_b^1, q_b^2, q_b^3, R_b)), m_w$ , and a group element  $h = (a, b, R_\alpha, R_\beta)$ , the group action  $h \cdot \tau$  is defined as:

$$h \cdot \tau = ((q_c^1 + a, q_c^2 + b), ((q_c^1 + a, q_c^2 + b, 0) + (R_\alpha * (q_b^1 - q_c^1, q_b^2 - q_c^2, q_b^3)), R_\alpha * R_b * R_\beta), m_w). \quad (17)$$

**Group-Equivariant Module  $\bar{h}$ :** Given a task parameter  $\tau = ((q_c^1, q_c^2), (q_b^1, q_b^2, q_b^3, R_b)), m_w$ ,  $\bar{h}(\tau) = (\bar{h}_1(\tau), \bar{h}_2(\tau), \bar{h}_3(\tau))$  is defined as follows:

$$\bar{h}_1(\tau) = (q_c^1, q_c^2) \in \mathbb{R}^2, \quad (18)$$

$$\bar{h}_2(\tau) = \text{Rot}(\hat{z}, \theta_1), \quad (19)$$

$$\bar{h}_3(\tau) = \text{Rot}(\hat{z}, (\theta_2 - \theta_1)), \quad (20)$$

where  $\theta_1 := \text{atan2}(q_b^2 - q_c^2, q_b^1 - q_c^1)$ ,  $\theta_2 := \text{atan2}(\hat{x}_b^2, \hat{x}_b^1)$ , and  $\hat{x}_b$  denotes the first column of  $R_b$ .

Given an arbitrary  $h = (a, b, R_\alpha, R_\beta)$ , where  $R_\alpha = \text{Rot}(\hat{z}, \alpha)$  and  $R_\beta = \text{Rot}(\hat{z}, \beta)$ , the equivariance of  $\bar{h}$  is shown by the following equation:

$$\begin{aligned} \bar{h}(h \cdot \tau) &= \bar{h}((q_c^1 + a, q_c^2 + b), ((q_c^1 + a, q_c^2 + b, 0) + (R_\alpha * (q_b^1 - q_c^1, q_b^2 - q_c^2, q_b^3)), R_\alpha * R_b * R_\beta), m_w) \\ &= ((q_c^1 + a, q_c^2 + b), \text{Rot}(\hat{z}, \alpha + \theta_1), \text{Rot}(\theta_2 - \theta_1 + \beta)) \\ &= ((q_c^1 + a, q_c^2 + b), R_\alpha * \text{Rot}(\hat{z}, \theta_1), \text{Rot}(\hat{z}, \theta_2 - \theta_1) * R_\beta) \\ &= ((q_c^1 + a, q_c^2 + b), R_\alpha * \text{Rot}(\hat{z}, \theta_1), R_\beta * \text{Rot}(\hat{z}, \theta_2 - \theta_1)) \\ &= (a, b, R_\alpha, R_\beta)((q_c^1, q_c^2), \text{Rot}(\hat{z}, \theta_1), \text{Rot}(\hat{z}, (\theta_2 - \theta_1))) \\ &= h\bar{h}(\tau). \end{aligned} \quad (21)$$

### C.3.2 Experimental Details

**Datasets:** The water-pouring demonstration trajectories are collected by recording videos of water-pouring motions of a human demonstrator for 8 seconds (intended for 3.5 seconds of reaching motion and 4.5 seconds of pouring motion) at 60fps, with three AprilTags, resulting in 480 frames. Then we extract the SE(3) trajectories of the bottle, whose length  $T = 480$ . We perform trajectory smoothing and transform task parameters and the trajectories using group actions of  $H$  for the cup's position to be the origin, and the bottle to be initially in the  $\hat{x}_s$ -direction from the bottle, and  $\hat{x}_b$  to be aligned with  $\hat{x}_s$ . The resulting task parameters are in the form of  $((0, 0), (r, 0, h, R, 0), m_w)$ .



Assuming the bottle to be initially on the table upright,  $r = 0.145$  is constant, and  $R = I$ . We gather 5 trajectories for 7 different  $r$  and 5 different  $m_w$  in a total of 175 trajectories. As shown in Figure 3 Left, we choose  $r$  at every 8cm, from 30cm to 78cm, i.e.,  $r \in \{0.3, 0.38, 0.46, 0.54, 0.62, 0.7, 0.78\}$ , and as shown in Figure 3 Right we choose  $m_w \in \{0.2, 0.27, 0.305, 0.34, 0.41\}$ . The dimensions of the cup and the bottle, and the position of the bottle frame are as illustrated in Figure 3 right. The five demonstrations of each task parameter are intended to pour water gradually from the left side of the cup and the right side of the cup.

We use 125 trajectories of  $r \in 0.3, 0.38, 0.54, 0.62, 0.78$  as the training dataset, and we randomly split the other 50 trajectories into half for validation and test dataset. We randomly augment the dataset 100 and 1,000 times for validation and test dataset respectively, resulting in 2,500 validation trajectories and 25,000 test trajectories.

**Network Architectures and Training Details:** The space of the task parameters is  $\mathbb{R}^2 \times \text{SE}(3) \times [0.2, 0.41]$ , where a task parameter can be represented in the form of  $((q_c^1, q_c^2), (q_b^1, q_b^2, q_b^3, R_b)), m_w)$ . Assuming that the bottle is initially on the table upright, since  $q_b^3$  is a constant variable and  $R_b$  can be represented as  $\text{Rot}\hat{z}, \theta_b$ , in practical implementation, we use  $(q_c^1, q_c^2, q_b^1, q_b^2, m_w, \cos \theta_b, \sin \theta_b) \in \mathbb{R}^7$  for input of the decoder.

The output of the model is an element in  $\text{SE}(3)^{480}$  which is not a vector space. A naive parameterization or  $\text{SE}(3)$  element (e.g. as a 12-dimensional vector) does not enforce the model outputs to satisfy  $\text{SE}(3)$  constraints. To constraint the model output space to be  $\text{SE}(3)^{480}$ , we first set all model output sizes to be  $480 \times 6 = 2880$ , and add an additional layer  $\text{Vec2SE3}$  at the end of every decoder. Given a vector  $v = (v^1, \dots, v^6) \in \mathbb{R}^6$ ,  $\text{Vec2SE3}$  is defined as:

$$\text{Vec2SE3} : v \mapsto \begin{bmatrix} \exp\left(\begin{bmatrix} 0 & -v_3 & v_2 \\ v_3 & 0 & -v_1 \\ -v_2 & v_1 & 0 \end{bmatrix}\right) & \begin{bmatrix} v^4 \\ v^5 \\ v^6 \end{bmatrix} \\ 0 & 1 \end{bmatrix} \in \text{SE}(3).$$

We finally vectorize the first three rows of the  $\text{SE}(3)$  matrix, since the last row is constant at  $(0, 0, 0, 1)$ .

We use two-layer fully connected neural networks of 168 nodes for the EMMP with elu as its activation function. TC-VAE's encoder includes a fully connected network and a temporal convolutional network, and the decoder includes two fully connected networks for  $z$  and  $\tau$ , a temporal convolutional network, and a fully connected network. All four fully connected networks used in TC-VAE are of two layers with size 512. The output sizes of fully connected networks for  $z$  and  $\tau$  in the decoder are 40 and 80 respectively. The two temporal convolutional layers in TC-VAE are both with channel sizes  $(36, 72, 144)$  and kernel size 3. More details on the structure of TC-VAE are in [26].

All models in the experiments have a similar number of parameters, where EMMP contains  $(1.51 \times 10^6)$  parameters and TC-VAE contains  $(1.56 \times 10^6)$  parameters.

**Task Parameters for Success Rate Measure:** We sample five feasible trajectories for four task parameters. Throughout the four task parameters, the cup's position  $(q_c^1, q_c^2) = (-0.2, 0)$ , the bottle is initially in the  $y$ -direction from the cup, i.e.,  $q_b^1 = -0.2$ , the bottle is initially aligned with the base frame, i.e.,  $R_b = I$ . The rest parts,  $(q_b^2, m_w)$  for the four task parameters are  $(0.35, 0.25)$ ,  $(0.45, 0.275)$ ,  $(0.40, 0.35)$ ,  $(0.55, 0.400)$ . These task parameters are picked within the robot's workspace.

**Obstacle Avoidance Algorithm:** Given a task parameter  $\tau$  and an obstacle, the obstacle avoidance task is performed as follows: (i) we sample  $z$  from  $p(z)$ , (ii) generate the bottle's trajectories via  $f(z, \tau)$ , (iii) check the collision between the bottle and the obstacle and pick collision-free trajectories, and (iv) solve the inverse kinematics problem of the robot and choose one that is feasible and also collision-free.

We check collisions between the bottle and the obstacle and between the robot and the obstacle by converting the meshes of the bottle and robot to point clouds, and parameterizing the obstacle as a superquadric, which represents objects as a sign distance function. As a sign distance function, superquadrics have benefits in checking if a point is inside or outside them. We consider a trajectory of a point cloud and a superquadric to be collision-free if none of the points in the point cloud gets inside the superquadric at every timestep, and consider they collide otherwise.



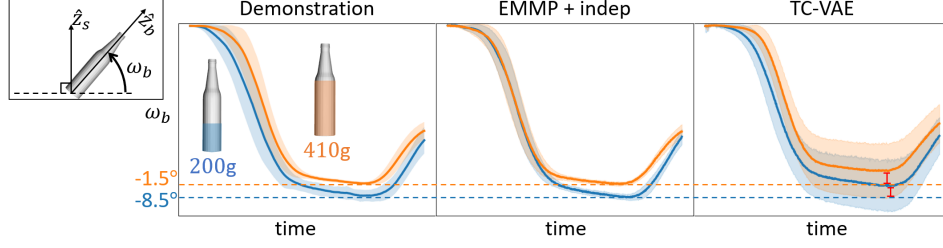

Figure 4: Graphes of bottle angle vs. time. The pouring angle  $\omega_b$  is the angle between the bottle axis  $\hat{z}_b$  and the  $xy$ -plane. The orange lines are pouring angles for the  $m_w = 0.41$  case, and the blue lines are pouring angles for the  $m_w = 0.20$  case. It can be observed that the pouring angle decreases as the mass of water increases.

### 248 C.3.3 Additional results

249 **Water-Pouring Performance Comparison:** The motions of the bottle pouring water near the cup  
 250 are highly dependent on the amount of water in the bottle. A bottle of small water needs to be tilted  
 251 more than a bottle that is almost full to pour the same amount of water into the cup. The amount of  
 252 tilting of the bottle can be captured in the angle between its axis and the table, which we denote as  
 253 the bottle angle.

254 Figure 4 illustrates bottle angle mean and standard deviation graphs of demonstration trajectories  
 255 of the training dataset (*Left*), generated trajectories of EMMP + indep (*Middle*) and generated tra-  
 256 jectories of TC-VAE (*Right*) with  $m_w = 200\text{g}$  (blue) and  $m_w = 410\text{g}$  (orange). We randomly  
 257 augment 50 task parameters of validation and test datasets 20 times, and pick 1,000 task parameters  
 258 for  $m_w = 200\text{g}$  and 1,000 task parameters for  $m_w = 410\text{g}$ . We generate 1,000 trajectories for both  
 259 cases using  $z$  sampled from  $p(z)$ .

260 Figure 4 *Left* shows that as the mass of water increases, the pouring angle increases, which means  
 261 the bottle is tilted less. It can be seen that the minimum mean angles of EMMP for  $m_w = 200\text{g}$   
 262 and  $m_w = 410\text{g}$  (-1.6 degrees and -9.5 degrees) are very much alike that of the demonstration  
 263 trajectories (-1.5 degrees and -8.5 degrees). On the other hand, the minimum mean angles of TC-  
 264 VAE (5.6 degrees and -3.1 degrees) are very much distant from the demonstration trajectories’.

265 **Equivariance Comparison:** For a motion manifold primitive framework to be equivariant, decoded  
 266 trajectories must equivariantly transform as task parameters undergo a symmetry transformation.  
 267 We qualitatively compare the equivariance performance of random data augmentation method and  
 268 equivariant learning method by comparing TC-VAE and EMMP + indep.

269 Figure 5 *Left* visualizes two trajectories generated from  $\tau$  and  $h \cdot \tau$ , where  $h$  is the rotation of the  
 270 bottle around the cup and itself, without translation. If the model is equivariant, the orange-colored  
 271 bottle and the apricot-colored bottle in the left upper corner should overlap. However, the condition  
 272 is not satisfied for TC-VAE, whereas the orange trajectory of EMMP is equivariantly transformed  
 273 with  $\tau$ .

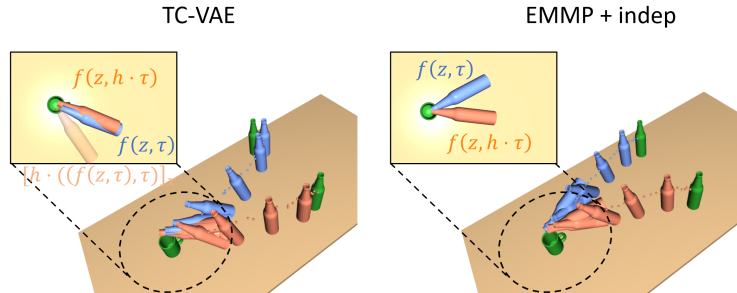

Figure 5:  $f(z, \tau)$  (blue) and  $f(z, h \cdot \tau)$  (orange), and  $[h \cdot (f(z, \tau), \tau)]_x$  (apricot).  $[h \cdot (f(z, \tau), \tau)]_x$  and  $f(z, h \cdot \tau)$  should be overlapped if the trajectories are generated equivariantly with the task parameters.

## References

- [1] M. Saveriano, F. J. Abu-Dakka, A. Kramberger, and L. Peternel. Dynamic movement primitives in robotics: A tutorial survey. *arXiv preprint arXiv:2102.03861*, 2021.
- [2] A. J. Ijspeert, J. Nakanishi, H. Hoffmann, P. Pastor, and S. Schaal. Dynamical movement primitives: learning attractor models for motor behaviors. *Neural computation*, 25(2):328–373, 2013.
- [3] A. J. Ijspeert, J. Nakanishi, and S. Schaal. Trajectory formation for imitation with nonlinear dynamical systems. In *Proceedings 2001 IEEE/RSJ International Conference on Intelligent Robots and Systems. Expanding the Societal Role of Robotics in the the Next Millennium (Cat. No. 01CH37180)*, volume 2, pages 752–757. IEEE, 2001.
- [4] A. J. Ijspeert, J. Nakanishi, and S. Schaal. Learning rhythmic movements by demonstration using nonlinear oscillators. In *Proceedings of the ieeersj int. conference on intelligent robots and systems (iros2002)*, number CONF, pages 958–963, 2002.
- [5] S. Schaal, P. Mohajerian, and A. Ijspeert. Dynamics systems vs. optimal control—a unifying view. *Progress in brain research*, 165:425–445, 2007.
- [6] A. Pervez, A. Ali, J.-H. Ryu, and D. Lee. Novel learning from demonstration approach for repetitive teleoperation tasks. In *2017 IEEE World Haptics Conference (WHC)*, pages 60–65. IEEE, 2017.
- [7] Y. Fanger, J. Umlauf, and S. Hirche. Gaussian processes for dynamic movement primitives with application in knowledge-based cooperation. In *2016 IEEE/RSJ International Conference on Intelligent Robots and Systems (IROS)*, pages 3913–3919. IEEE, 2016.
- [8] J. Umlauf, Y. Fanger, and S. Hirche. Bayesian uncertainty modeling for programming by demonstration. In *2017 IEEE International Conference on Robotics and Automation (ICRA)*, pages 6428–6434. IEEE, 2017.
- [9] A. Pervez, Y. Mao, and D. Lee. Learning deep movement primitives using convolutional neural networks. In *2017 IEEE-RAS 17th international conference on humanoid robotics (Humanoids)*, pages 191–197. IEEE, 2017.
- [10] S. Bahl, M. Mukadam, A. Gupta, and D. Pathak. Neural dynamic policies for end-to-end sensorimotor learning. *Advances in Neural Information Processing Systems*, 33:5058–5069, 2020.
- [11] S. M. Khansari-Zadeh and A. Billard. Learning stable nonlinear dynamical systems with gaussian mixture models. *IEEE Transactions on Robotics*, 27(5):943–957, 2011.
- [12] K. Neumann, A. Lemme, and J. J. Steil. Neural learning of stable dynamical systems based on data-driven lyapunov candidates. In *2013 IEEE/RSJ International Conference on Intelligent Robots and Systems*, pages 1216–1222. IEEE, 2013.
- [13] S. M. Khansari-Zadeh and A. Billard. Learning control lyapunov function to ensure stability of dynamical system-based robot reaching motions. *Robotics and Autonomous Systems*, 62(6): 752–765, 2014.
- [14] A. Lemme, K. Neumann, R. F. Reinhart, and J. J. Steil. Neural learning of vector fields for encoding stable dynamical systems. *Neurocomputing*, 141:3–14, 2014.
- [15] K. Neumann and J. J. Steil. Learning robot motions with stable dynamical systems under diffeomorphic transformations. *Robotics and Autonomous Systems*, 70:1–15, 2015.
- [16] C. Blocher, M. Saveriano, and D. Lee. Learning stable dynamical systems using contraction theory. In *2017 14th International Conference on Ubiquitous Robots and Ambient Intelligence (URAI)*, pages 124–129. IEEE, 2017.
- [17] N. Figueroa and A. Billard. A physically-consistent bayesian non-parametric mixture model for dynamical system learning. In *CoRL*, pages 927–946, 2018.

- 321 [18] V. Sindhvani, S. Tu, and M. Khansari. Learning contracting vector fields for stable imitation  
322 learning. *arXiv preprint arXiv:1804.04878*, 2018.
- 323 [19] J. Z. Kolter and G. Manek. Learning stable deep dynamics models. *Advances in neural infor-*  
324 *mation processing systems*, 32, 2019.
- 325 [20] D. P. Kingma and M. Welling. Auto-encoding variational bayes. *arXiv preprint*  
326 *arXiv:1312.6114*, 2013.
- 327 [21] Y. Lee, H. Kwon, and F. Park. Neighborhood reconstructing autoencoders. *Advances in Neural*  
328 *Information Processing Systems*, 34:536–546, 2021.
- 329 [22] Y. Lee, S. Yoon, M. Son, and F. C. Park. Regularized autoencoders for isometric representation  
330 learning. In *International Conference on Learning Representations*, 2022.
- 331 [23] C. Jang, Y. Lee, Y.-K. Noh, and F. C. Park. Geometrically regularized autoencoders for non-  
332 euclidean data. In *The Eleventh International Conference on Learning Representations*.
- 333 [24] S. Rifai, P. Vincent, X. Muller, X. Glorot, and Y. Bengio. Contractive auto-encoders: Explicit  
334 invariance during feature extraction. In *Proceedings of the 28th international conference on*  
335 *international conference on machine learning*, pages 833–840, 2011.
- 336 [25] A. Creswell, Y. Mohamied, B. Sengupta, and A. A. Bharath. Adversarial information factor-  
337 ization. *arXiv preprint arXiv:1711.05175*, 2017.
- 338 [26] M. Noseworthy, R. Paul, S. Roy, D. Park, and N. Roy. Task-conditioned variational autoen-  
339 coders for learning movement primitives. In *Conference on robot learning*, pages 933–944.  
340 PMLR, 2020.
- 341 [27] M. M. Bronstein, J. Bruna, T. Cohen, and P. Veličković. Geometric deep learning: Grids,  
342 groups, graphs, geodesics, and gauges. *arXiv preprint arXiv:2104.13478*, 2021.
- 343 [28] S. Albawi, T. A. Mohammed, and S. Al-Zawi. Understanding of a convolutional neural net-  
344 work. In *2017 international conference on engineering and technology (ICET)*, pages 1–6.  
345 Ieee, 2017.
- 346 [29] T. Cohen and M. Welling. Group equivariant convolutional networks. In *International confer-*  
347 *ence on machine learning*, pages 2990–2999. PMLR, 2016.
- 348 [30] T. S. Cohen, M. Geiger, J. Köhler, and M. Welling. Spherical cnns. *arXiv preprint*  
349 *arXiv:1801.10130*, 2018.
- 350 [31] A. Simeonov, Y. Du, A. Tagliasacchi, J. B. Tenenbaum, A. Rodriguez, P. Agrawal, and V. Sitz-  
351 mann. Neural descriptor fields: Se (3)-equivariant object representations for manipulation. In  
352 *2022 International Conference on Robotics and Automation (ICRA)*, pages 6394–6400. IEEE,  
353 2022.
- 354 [32] S. Kim, B. Lim, Y. Lee, and F. C. Park. Se (2)-equivariant pushing dynamics models for  
355 tabletop object manipulations. In *Conference on Robot Learning*, pages 427–436. PMLR,  
356 2023.
- 357 [33] M. I. Belghazi, A. Baratin, S. Rajeshwar, S. Ozair, Y. Bengio, A. Courville, and D. Hjelm.  
358 Mutual information neural estimation. In *International conference on machine learning*, pages  
359 531–540. PMLR, 2018.
